# Supplementary material for: Pseudomonas aeruginosa uses multiple receptors for adherence to laminin during infection of the respiratory tract and skin wounds
Source: PubMed Central journal article supplement (PMC6890786; doi:10.1038/s41598-019-54622-z), 2019-12-03
Supplement: 41598_2019_54622_MOESM1_ESM.pdf [file 41598_2019_54622_MOESM1_ESM.pdf]

## Supplementary data

### ***Pseudomonas aeruginosa* uses multiple receptors for adherence to laminin during infection of the respiratory tract and skin wounds**

Magnus Paulsson<sup>a, b</sup>, Yu-Ching Su<sup>a</sup>, Tamara Ringwood<sup>a</sup>, Fabian Uddén<sup>a</sup> and Kristian Riesbeck<sup>a</sup>

<sup>a</sup> Clinical Microbiology, Department of Translational Medicine, Faculty of Medicine, Lund University, Jan Waldenströms gata 59, SE-205 02 Malmö, Sweden

<sup>b</sup> Division for Infectious Diseases, Skåne University Hospital, Lund, Sweden

## Supplementary data, Table S1: Clinical and laboratory strains used in this study

| <b>Clinical strains</b>                         |                                                                                 |                             |
|-------------------------------------------------|---------------------------------------------------------------------------------|-----------------------------|
| <i>Name</i>                                     | <i>Description</i>                                                              | <i>Reference</i>            |
| KR796, KR797, KR801, KR802, KR809, KR811        | Clinical <i>P. aeruginosa</i> isolates from airway cultures of patients with CF | 1                           |
| KR794, KR798, KR825, KR826, KR827, KR828        | Clinical <i>P. aeruginosa</i> isolate from urine culture                        | <sup>1</sup> and this study |
| KR799, KR800, KR812, KR813, KR814, KR829, KR830 | Clinical <i>P. aeruginosa</i> isolates from blood cultures                      | <sup>1</sup> and this study |
| KR1158, KR1159, KR1160, KR1161, KR1162, KR1163  | Clinical <i>P. aeruginosa</i> isolates from chronic wound cultures              | This study                  |
| <b>Laboratory strains</b>                       |                                                                                 |                             |
| <i>Name</i>                                     | <i>Description</i>                                                              | <i>Reference</i>            |
| <i>E. coli</i> BL21(DE3)                        | <i>E. coli</i> laboratory strain                                                |                             |
| <i>E. coli</i> -EstA                            | <i>E. coli</i> BL21(DE3) with vector pet-26(b)+ and insert <i>estA</i>          | This study                  |
| <i>E. coli</i> -OprD                            | <i>E. coli</i> BL21(DE3) with vector pet-26(b)+ and insert <i>oprD</i>          | 1                           |
| <i>E. coli</i> -OprG                            | <i>E. coli</i> BL21(DE3) with vector pet-26(b)+ and insert <i>oprG</i>          | This study                  |
| <i>E. coli</i> -PA3923                          | <i>E. coli</i> BL21(DE3) with vector pet-26(b)+ and insert PA3923               | This study                  |
| <i>E. coli</i> -Paf                             | <i>E. coli</i> BL21(DE3) with vector pet-26(b)+ and insert <i>paf</i>           | 2                           |
| MPAO1                                           | <i>P. aeruginosa</i> reference strain. Clone of PAO1.                           | 3                           |
| PW9583                                          | MPAO1 mutant with transposon insert in <i>estA</i> (PA5112)                     | 3                           |
| PW2742                                          | MPAO1 mutant with transposon insert in <i>oprD</i> (PA0958).                    | 3                           |
| PW7877                                          | MPAO1 mutant with transposon insert in <i>oprG</i> (PA4067)                     | 3                           |
| PW7631                                          | MPAO1 mutant with transposon insert in loci PA3923                              | 3                           |
| PW5054                                          | MPAO1 mutant with transposon insert in <i>paf</i> (PA2407)                      | 3                           |

**Supplementary data, Table S2: List of primers used for cloning.**

| <b>Primer</b>                  | <b>Sequence 5'-3'</b>                         | <b>GenBank<br/>Accession<br/>number</b> | <b>Locus tag</b> |
|--------------------------------|-----------------------------------------------|-----------------------------------------|------------------|
| <i>estA_fwd</i> <sup>a</sup>   | GAACGGATCCGGCTCCTTCGCCCTATTCGACG              | <a href="#">AAG08497.1</a>              | PA5112           |
| <i>estA_rev</i> <sup>b</sup>   | TCAGAAGCTTGAAGTCCAGGCTCAGCGCCAG               |                                         |                  |
| <i>oprD_fwd</i> <sup>a</sup>   | CTGAGGATCCGGACGCATTCGTCAGCGATCAG<br>GCC       | <a href="#">AAG04347.1</a>              | PA0958           |
| <i>oprD_rev</i> <sup>b</sup>   | CTGACAAGCTTCAGGATCGACAGCGGATAGTC<br>GACGATCAG |                                         |                  |
| <i>oprG_fwd</i> <sup>a</sup>   | GAACGGATCCGGCGGATATTCAAGGACACAAG<br>G         | <a href="#">AAG07454.1</a>              | PA4067           |
| <i>oprG_rev</i> <sup>b</sup>   | TCAGAAGCTTGAAGTTGTAGCCGAAACCGATCA             |                                         |                  |
| <i>PA3923_fwd</i> <sup>a</sup> | GAACGGATCCGGTGACCTTCAACATCGGGGAA<br>AT        | <a href="#">AAG07310.1</a>              | PA3923           |
| <i>PA3923_rev</i> <sup>b</sup> | TCAGAAGCTTGAAGTTCATGCCGAAGCTGAG               |                                         |                  |
| <i>Paf_fwd</i> <sup>a</sup>    | AAGGATCCGGAAGACGGCAAACGCCTG                   | <a href="#">AAG05795.1</a>              | PA2407           |
| <i>Paf_rev</i> <sup>b</sup>    | TTAAGCTTTGCGCCGGACTCCTGGATG                   |                                         |                  |

<sup>a-b</sup> Restriction enzyme cutting sites are in italic type: <sup>a</sup>*Bam*HI, <sup>b</sup>*Hind*III

**Supplementary data, Table S3: List of identified proteins by MALDI-TOF in 2D-SDS PAGE.**

| ID <sup>a</sup> | Protein description and function                | Gene <sup>b</sup> | Locus tag <sup>b</sup> | GenBank accession number <sup>c</sup> | Molecular weight on the gel (kDa) | Predicted molecular weight (kDa) <sup>d</sup> | pI <sup>d</sup> | Subcellular localization <sup>e</sup> | Score | Sequence coverage (%) |
|-----------------|-------------------------------------------------|-------------------|------------------------|---------------------------------------|-----------------------------------|-----------------------------------------------|-----------------|---------------------------------------|-------|-----------------------|
| 1               | Autotransporter esterase                        | <i>estA</i>       | PA5112                 | AAG08497                              | 70                                | 69.6                                          | 4.68            | Outer membrane                        | 394   | 37                    |
| 2               | Hypothetical protein                            | -                 | PA3923                 | AAG07310                              | 72                                | 69.5                                          | 4.94            | Outer membrane                        | 270   | 28                    |
| 3               | Porin D                                         | <i>oprD</i>       | PA0958                 | NP_249649                             | 48                                | 48.4                                          | 4.96            | Outer membrane                        | 665   | 73                    |
| 4*              | outer membrane porin OprQ                       | <i>oprQ</i>       | PA2760                 | AAG06148                              | 45                                | 46.9                                          | 5.54            | Outer membrane                        | 736   | 60                    |
| 4**             | outer membrane porin OprQ                       | <i>oprQ</i>       | PA2760                 | AAG06148                              | 45                                | 46.9                                          | 5.80            | Outer membrane                        | 474   | 55                    |
| 5               | FadL long chain fatty acid transport protein    | <i>fadL</i>       | PA1288                 | AAG04677                              | 45                                | 45.6                                          | 5.73            | Outer membrane                        | 557   | 53                    |
| 6               | Outer membrane protein OprG                     | <i>oprG</i>       | PA4067                 | AAG07454                              | 25                                | 25.2                                          | 4.85            | Outer membrane                        | 375   | 50                    |
| 7               | Lipid A 3-O-deacyllase, PagL                    | <i>pagL</i>       | PA4661                 | AAG08048                              | 20                                | 18.4                                          | 5.86            | Unknown                               | 449   | 100                   |
| 8               | DNA-binding stress protein                      | <i>dps</i>        | PA0962                 | AAG04351                              | 15                                | 17.5                                          | 4.96            | Cytoplasmic                           | 410   | 69                    |
| 9*              | anaerobically-induced outer membrane porin OprE | <i>oprE</i>       | PA0291                 | AAG03680                              | 40                                | 49.7                                          | 7.00            | Outer membrane                        | 502   | 59                    |
| 9**             | anaerobically-induced outer membrane porin OprE | <i>oprE</i>       | PA0291                 | AAG03680                              | 40                                | 49.7                                          | 8.67            | Outer membrane                        | 722   | 71                    |
| 9***            | anaerobically-induced outer                     | <i>oprE</i>       | PA0291                 | AAG03680                              | 40                                | 49.7                                          | 8.80            | Outer membrane                        | 372   | 49                    |

|    |                                                                              |             |        |          |    |      |      |                |     |    |
|----|------------------------------------------------------------------------------|-------------|--------|----------|----|------|------|----------------|-----|----|
|    | membrane porin<br>OprE                                                       |             |        |          |    |      |      |                |     |    |
| 10 | PhoP/Q and low<br>Mg <sup>2+</sup> inducible<br>outer membrane<br>protein H1 | <i>oprH</i> | PA1178 | AAG04567 | 16 | 21.6 | 9.00 | Outer membrane | 614 | 74 |

<sup>a</sup> Spot 4\* and 4\*\* are the isoforms (different pI but same molecular weight) of OprQ; spot 9\*, 9\*\* and 9\*\*\* are the isoforms of OprE.

<sup>b</sup> Gene name and locus tag are based on Pseudomonas Genome DB <http://pseudomonas.com/>

<sup>c</sup> Accession number indicated is based upon the PAO1 annotated genome database at GenBank.

<sup>d</sup> Molecular weight and isoelectric focusing point (pI) of each protein is predicted using ProtParam tool (<https://web.expasy.org/protparam/>) except for isoform spots 4\*\*, 9\* and 9\*\*\* that were estimated from the gels.

<sup>e</sup> Predicted subcellular localization based on PSORTb v3.0.

Supplementary data, Figure S1

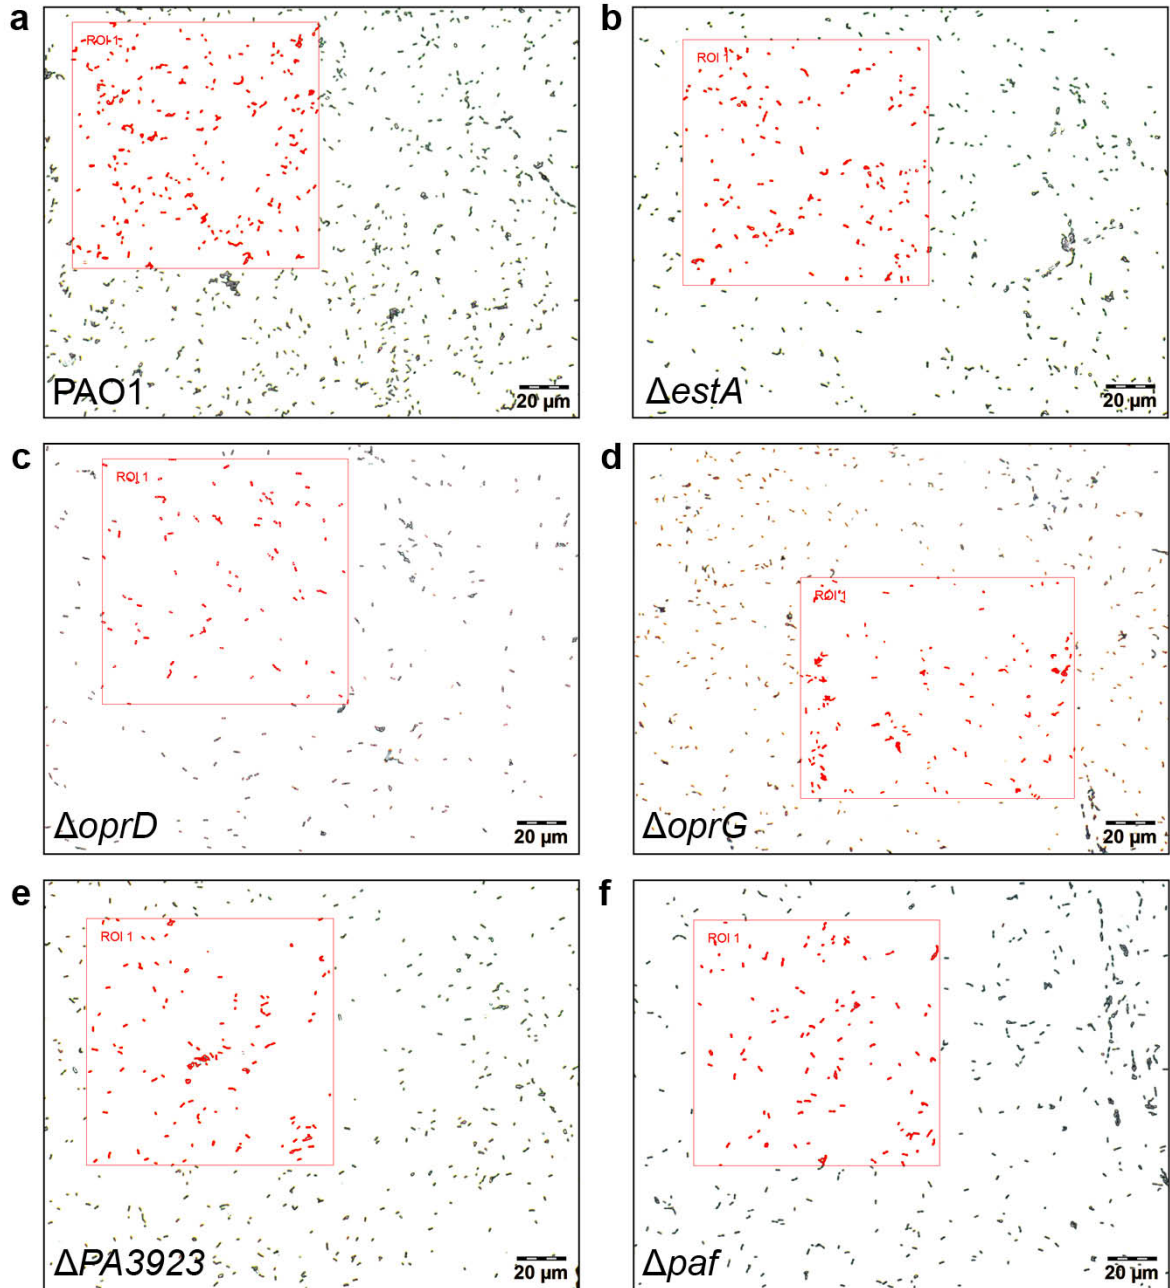

**Figure S1. *Pseudomonas aeruginosa* adherence to immobilized laminin.** *Pseudomonas aeruginosa* wild type PAO1(a) and mutated strains devoid of laminin receptors (b-f, as denoted) were subjected to laminin-111 coated glass slides. Adherent bacteria were automatically counted by the light microscopy image analysis software cellSens (Olympus) in 6 randomly selected regions of interest (ROI, red), in biological triplicates. One representative picture of each strain is shown.

## References

1. Paulsson, M. *et al.* Identification of outer membrane Porin D as a vitronectin-binding factor in cystic fibrosis clinical isolates of *Pseudomonas aeruginosa*. *J. Cyst. Fibros.* **14**, 600–607 (2015).
2. Su, Y.-C. *et al.* *Haemophilus* Protein F Orthologs of Pathogens Infecting the Airways: Exploiting Host Laminin at Heparin-Binding Sites for Maximal Adherence to Epithelial Cells. *J. Infect. Dis.* **216**, 1303–1307 (2017).
3. Held, K., Ramage, E., Jacobs, M., Gallagher, L. & Manoil, C. Sequence-verified two-allele transposon mutant library for *Pseudomonas aeruginosa* PAO1. *J. Bacteriol.* **194**, 6387–6389 (2012).
